# Supplementary material for: Data Centre Profile: The Provincial Health Data Centre of the Western Cape Province, South Africa
Source: PubMed Central journal article supplement (PMC7482518; doi:10.23889/ijpds.v4i2.1143), 2019-11-20
Supplement: ijpds-04-1143-s001.pdf [file ijpds-04-1143-s001.pdf]

Table 1. Data Sources incorporated into the PHDC

| Name            | Category           | Description                                                                                                                                                                                                                                                  | Period | Weekday volume                                                                                          | Records to date                                          | Frequency | Method                                                                                       |
|-----------------|--------------------|--------------------------------------------------------------------------------------------------------------------------------------------------------------------------------------------------------------------------------------------------------------|--------|---------------------------------------------------------------------------------------------------------|----------------------------------------------------------|-----------|----------------------------------------------------------------------------------------------|
| <b>Clinicom</b> | Hospital           | <b>Clinicom hospital information system</b><br>The hospital information system in all 52 hospitals in the province which also provides the enterprise patient master index (PMI)                                                                             | 1994-  | 1600 new patients added to PMI<br>1700 new Admissions<br>18000 new outpatient visits for 12500 patients | 9.4 million admissions<br>70.8 million outpatient visits | Daily     | Linked Server                                                                                |
| <b>PHCIS</b>    | Primary care       | <b>Primary Health Care Information System</b><br>Used for patient administration and routine information collection in the 272 Western Cape Provincial primary care clinics, and as a disease register for HIV and TB in an increasing number of facilities. | 2007-  | 30000 visits (unique by patient and facility)                                                           | 44 million primary care visits                           | Daily     | Holding database                                                                             |
| <b>PREHMIS</b>  | Primary care       | <b>Patient Registration and Health Management Information System</b><br>Used for patient administration and routine information collection in the 82 City of Cape Town primary care clinics                                                                  | 2015-  | 11000 visits (unique by patient and facility)                                                           | 6 million primary care visits                            | Daily     | FTP (internal)                                                                               |
| <b>NHLS</b>     | Laboratory         | <b>National Health Laboratory Service</b><br>Used for tracking and managing laboratory tests in all public health facilities in South Africa                                                                                                                 | 2007-  | 177000 test result lines for 8600 patients                                                              | 500 million records                                      | Daily     | FTP (external)                                                                               |
| <b>JAC</b>      | Pharmacy           | <b>JAC Pharmacy System</b><br>A centralised medicine management and dispensing system used in 44 hospitals and 65 primary care facilities in the Western Cape Province.                                                                                      | 2010-  | 77000 items dispensed for 20000 patients                                                                | 102 million items dispensed                              | Daily     | Linked Server                                                                                |
| <b>CDU</b>      | Pharmacy           | <b>Chronic Dispensing Unit</b><br>An automated warehouse pharmacy which pre-packages and dispatches medication for stable chronic patients.                                                                                                                  | 2012-  | 42000 items dispensed for 8000 patients                                                                 | 91 million items dispensed                               | Monthly   | Manual retrieval                                                                             |
| <b>TIER.Net</b> | Disease Management | <b>Three Interlinked Electronic Registers</b><br>Off-line electronic register for monitoring HIV treatment in use in over 100 clinics, and into which data are imported from other HIV register systems                                                      | 2001-  | 4300 new treatment visits<br>180 new patients registered                                                | 650,000 patient/facility combinations                    | Quarterly | Linked Server to central database into which dispatches are loaded from each site quarterly. |

|                        |                     |                                                                                                                                                                                                                                                                                                                                                                         |       |                                                        |                                                        |              |                  |
|------------------------|---------------------|-------------------------------------------------------------------------------------------------------------------------------------------------------------------------------------------------------------------------------------------------------------------------------------------------------------------------------------------------------------------------|-------|--------------------------------------------------------|--------------------------------------------------------|--------------|------------------|
| <b>ETR.Net</b>         | Disease Management  | <b>Electronic Tuberculosis Register</b><br>The standalone electronic register for tuberculosis programme monitoring, being decommissioned during 2019. Pages from the paper tuberculosis register are sent to sub-district offices for capture into ETR.Net.                                                                                                            | 2001- | 122 new patients started on TB treatment               | 820,000 registrations on ETR                           | Quarterly    | Linked Server    |
| <b>EDRWeb</b>          | Disease Management  | <b>Electronic Drug-resistant Tuberculosis Register</b><br>Web-based information system for treatment of drug-resistant tuberculosis patients                                                                                                                                                                                                                            | 2007- | 50 new drug resistant TB patients started on treatment | 43,000 drug resistant TB patients started on treatment | Weekly       | Manual retrieval |
| <b>SINJANI</b>         | Aggregate reporting | <b>Standard Information Jointly Assembled by Networked Infrastructure</b> (DHIS equivalent)<br>Web-based portal for collecting and reporting aggregate information in the Western Cape Department of Health, feeding into the national District Health Information System. The system also collects discrete sets of patient-level data such as maternal mortality data | 2000- | 1 or fewer new maternal deaths                         | 885 maternal deaths                                    | Daily        | Linked Server    |
| <b>EMS</b>             | Emergency Transport | <b>Emergency medical services</b><br>Call management and ambulance dispatching system for emergencies, with incident and limited clinical data variously available.                                                                                                                                                                                                     | 2014- | 2300 calls logged                                      | 3.4 million calls                                      | Periodically | FTP (internal)   |
| <b>HealthNet</b>       | Patient Transport   | A system used for booking transport of patients from their home to a health care facility                                                                                                                                                                                                                                                                               | 2015- | 1000 calls logged                                      | 620,000 calls                                          | Periodically | FTP (internal)   |
| <b>HECTIS</b>          | Emergency Centre    | <b>Health and Emergency Centre Tracking Information System</b><br>A web-based interface for managing Emergency Centres that enables real-time tracking of patients from arrival to the Emergency Centre to Discharge, currently implemented at six hospitals in the province                                                                                            | 2017- | 400 EC visits                                          | 300,000 EC visits                                      | Daily        | Linked Server    |
| <b>ECCR</b>            | Hospital            | <b>Electronic Continuity of Care Record</b><br>A web-based platform for capturing discharge summaries with improved clinical coding                                                                                                                                                                                                                                     | 2016- | 650 discharge summaries                                | 390,000 discharge summaries                            | Daily        | Linked Server    |
| <b>Catch and Match</b> | Community           | <b>Catch and Match community health worker application</b><br>A mobile application used by Community Health Care Workers to assist screening of community members and to refer patients for follow up at health care facilities                                                                                                                                         | 2015- | 60 new household registrations                         | 10,000 households and 40,000 individuals               | Hourly       | Holding database |

|                     |                    |                                                                                                                                                                                                                                                                                            |           |                                    |                               |                                     |                  |
|---------------------|--------------------|--------------------------------------------------------------------------------------------------------------------------------------------------------------------------------------------------------------------------------------------------------------------------------------------|-----------|------------------------------------|-------------------------------|-------------------------------------|------------------|
| <b>MomConnect</b>   | Maternal health    | <b>MomConnect pregnancy health promotion solution</b><br>A National Department of Health initiative to support maternal health through cell phone-based technologies                                                                                                                       | 2014-     | 90 new registrations on MomConnect | 120,000                       | Daily                               | FTP (internal)   |
| <b>Hello Doctor</b> | Tele-triage        | <b>Hello Doctor tele-consultation service</b><br>A tele-triage system that allows patients to speak to a doctor telephonically and proceed directly to the pharmacy for over-the-counter medications                                                                                       | 2017-     | 20 calls logged per day            | 7,500 calls logged            | Monthly                             | Manual retrieval |
| <b>PPIP</b>         | Mortality          | <b>Perinatal Problem Identification System.</b><br>An application developed by the Medical Research Council used in most paediatric departments to record adverse perinatal outcomes                                                                                                       | 2000-     | 2 new deaths per day               | 42,000 infant deaths recorded | Periodically                        | Manual retrieval |
| <b>BOD</b>          | Mortality          | <b>Burdern of Disease surveillance system</b><br>Cause-of-death data from copied of official death certificates received from the Department of Home Affairs                                                                                                                               | 2010-2013 | N/A                                | 126,000 deaths recorded       | No longer receiving                 | -                |
| <b>ChIP</b>         | Mortality          | <b>Child Healthcare Problem Identification Programme.</b><br>A mortality audit tool designed specifically for infants and children (up to 18 years) with the aim to use reviews based on the data collected to improve the quality of care that sick children receive in the health system | -         | -                                  | -                             | Data transfer agreement in progress | -                |
| <b>WCBTS</b>        | Blood transfusions | <b>Western Cape Blood Transfusion Services</b><br>Details of blood products ordered by public sector facilities                                                                                                                                                                            | -         | -                                  | -                             | Data transfer agreement in progress | -                |
| <b>PACS</b>         | Radiology          | <b>Picture Archiving and Communication System</b><br>Details of radiology imaging from both PACS systems and associated radiology information systems (RIS) where implemented                                                                                                              | -         | -                                  | -                             | Data transfer agreement in progress | -                |

\*Daily volume shown is the approximate average volume of new records received per day on weekdays (Monday-Friday) from 2018-01-01 to 2019-05-31
